# Supplementary material for: Environmental scan and evaluation of best practices for online systematic review resources
Source: PubMed Central journal article supplement (PMC5886503; doi:10.5195/jmla.2018.241), 2018-04-01
Supplement: jmla-106-208-s001.pdf [file jmla-106-208-s001.pdf]

## Environmental scan and evaluation of best practices for online systematic review resources

Robin M. N. Parker, MLIS; Leah Boulos; Sarah Visintini; Krista Ritchie; Jill Hayden

### APPENDIX A

#### Environmental scan searches

##### Websites searched

("systematic review" OR "comprehensive review" OR "scoping review" OR "evidence review" OR "knowledge synthesis" OR "evidence synthesis") AND (train OR training OR education OR instruction OR learn OR learning OR course OR workshop OR seminar OR class site):[INSERT SITE]

| Knowledge synthesis organizations                                                                                  | Website                                                                                                                                                                                                                                                  |
|--------------------------------------------------------------------------------------------------------------------|----------------------------------------------------------------------------------------------------------------------------------------------------------------------------------------------------------------------------------------------------------|
| Agency for Healthcare Research and Quality (AHRQ)                                                                  | <a href="http://www.ahrq.gov">www.ahrq.gov</a>                                                                                                                                                                                                           |
| Alberta College of Family Physicians (ACFP)                                                                        | <a href="https://www.acfp.ca/tools-for-practice/">https://www.acfp.ca/tools-for-practice/</a>                                                                                                                                                            |
| Alberta Health: Health Technology Assessment Provincial Reviews – Ongoing and Complete                             | <a href="http://www.health.alberta.ca/initiatives/AHTDP-reviews.html">www.health.alberta.ca/initiatives/AHTDP-reviews.html</a>                                                                                                                           |
| Australian Government Department of Health and Ageing: Australia and New Zealand Horizon Scanning Network (ANZHSN) | <a href="http://www.horizonscanning.gov.au/internet/horizon/publishing.nsf/Content/technologies-assessed-lp-2">www.horizonscanning.gov.au/internet/horizon/publishing.nsf/Content/technologies-assessed-lp-2</a>                                         |
| Australian Government Department of Health and Ageing: Medical Services Advisory Committee (MSAC)                  | <a href="http://www.msac.gov.au/internet/msac/publishing.nsf/Content/completed-assessments">www.msac.gov.au/internet/msac/publishing.nsf/Content/completed-assessments</a>                                                                               |
| Australian Government Department of Health and Ageing: Pharmaceuticals Benefits Scheme                             | <a href="http://www.pbs.gov.au/browse/medicine-listing">www.pbs.gov.au/browse/medicine-listing</a>                                                                                                                                                       |
| Best Evidence Medical Education (BEME) Collaboration                                                               | <a href="http://www.bemecollaboration.org">www.bemecollaboration.org</a>                                                                                                                                                                                 |
| Blue Cross and Blue Shield Association Technology Evaluation Center (TEC)                                          | <a href="https://www.bcbs.com/node/1516">https://www.bcbs.com/node/1516</a>                                                                                                                                                                              |
| California Technology Assessment Forum (CTAF)                                                                      | <a href="http://ctaf.org">ctaf.org</a>                                                                                                                                                                                                                   |
| Campbell Collaboration                                                                                             | <a href="http://www.campbellcollaboration.org">www.campbellcollaboration.org</a>                                                                                                                                                                         |
| Canadian Agency for Drugs and Technologies in Health (CADTH)                                                       | <a href="https://www.cadth.ca">https://www.cadth.ca</a>                                                                                                                                                                                                  |
| Centers for Medicare & Medicaid Services Technology Assessments                                                    | <a href="http://www.cms.gov/medicare-coverage-database/indexes/technology-assessments-index.aspx?TAId=85&amp;bc=AAAQAAAAAAAA&amp;">www.cms.gov/medicare-coverage-database/indexes/technology-assessments-index.aspx?TAId=85&amp;bc=AAAQAAAAAAAA&amp;</a> |
| EuroScan International Network                                                                                     | <a href="http://www.euroscan.org.uk">www.euroscan.org.uk</a>                                                                                                                                                                                             |
| Evidence for Policy and Practice Information and Co-ordinating Centre (EPPI-Centre)                                | <a href="http://eppi.ioe.ac.uk/cms/">eppi.ioe.ac.uk/cms/</a>                                                                                                                                                                                             |

| Knowledge synthesis organizations                                                                          | Website                                                                                                                                                |
|------------------------------------------------------------------------------------------------------------|--------------------------------------------------------------------------------------------------------------------------------------------------------|
| Federal Reserve Bank of St. Louis: Economic Research Division: IDEAS Database                              | <a href="http://ideas.repec.org">ideas.repec.org</a>                                                                                                   |
| Health Information and Quality Authority (Ireland): Health Technology Assessment                           | <a href="http://www.hiqa.ie/healthcare/health-technology-assessment/assessments">www.hiqa.ie/healthcare/health-technology-assessment/assessments</a>   |
| Health Quality Council of Alberta (HQCA)                                                                   | <a href="http://www.hqca.ca">www.hqca.ca</a>                                                                                                           |
| Health Quality Ontario                                                                                     | <a href="http://www.hqontario.ca/evidence/publications-and-ohtac-recommendations">www.hqontario.ca/evidence/publications-and-ohtac-recommendations</a> |
| Health Services Executive: Irish Health Repository (Lenus)                                                 | <a href="http://www.lenus.ie/hse/">www.lenus.ie/hse/</a>                                                                                               |
| Healthcare Improvement Scotland                                                                            | <a href="http://www.healthcareimprovementscotland.org">www.healthcareimprovementscotland.org</a>                                                       |
| INAHTA                                                                                                     | <a href="http://www.inahta.org">www.inahta.org</a>                                                                                                     |
| Institut national d'excellence en santé et en services sociaux                                             | <a href="http://www.inesss.qc.ca/index.php?id=49&amp;L=1">www.inesss.qc.ca/index.php?id=49&amp;L=1</a>                                                 |
| Institute for Clinical and Economic Review (ICER)                                                          | <a href="http://www.icer-review.org/">www.icer-review.org/</a>                                                                                         |
| Institute of Health Economics (IHE)                                                                        | <a href="http://www.ihe.ca">www.ihe.ca</a>                                                                                                             |
| International Society for Pharmacoeconomics and Outcomes Research (ISPOR): <i>Value in Health</i>          | <a href="http://www.valueinhealthjournal.com/issues">www.valueinhealthjournal.com/issues</a>                                                           |
| Joanna Briggs Institute                                                                                    | <a href="http://joannabriggs.org">joannabriggs.org</a>                                                                                                 |
| Knowledge Translation Canada (KT Canada)                                                                   | <a href="http://ktclearinghouse.ca/ktcanada">ktclearinghouse.ca/ktcanada</a>                                                                           |
| Manitoba Centre for Health Policy: Deliverables                                                            | <a href="http://mchp-appserv.cpe.umanitoba.ca/deliverablesList.html">mchp-appserv.cpe.umanitoba.ca/deliverablesList.html</a>                           |
| McGill University Health Centre (MUHC): Technology Assessment Unit of the MUHC                             | <a href="http://www.mcgill.ca/tau/publications/">www.mcgill.ca/tau/publications/</a>                                                                   |
| McMaster University: Centre for Health Economics and Policy Analysis (CHEPA)                               | <a href="http://www.chepa.org/research-papers/faculty-publications">www.chepa.org/research-papers/faculty-publications</a>                             |
| Monash Health Centre for Clinical Effectiveness (CCE)                                                      | <a href="http://www.monashhealth.org/page/CCE">www.monashhealth.org/page/CCE</a>                                                                       |
| National Centre for Pharmacoeconomics: Pharmacoeconomic Evaluations                                        | <a href="http://www.ncpe.ie/pharmacoeconomic-evaluations/">www.ncpe.ie/pharmacoeconomic-evaluations/</a>                                               |
| National Collaborating Centre for Methods and Tools (NCCMT)                                                | <a href="http://www.nccmt.ca">www.nccmt.ca</a>                                                                                                         |
| National Institute for Health and Care Excellence (NICE)                                                   | <a href="http://www.nice.org.uk">www.nice.org.uk</a>                                                                                                   |
| National Institute for Health Research (NIHR): Evaluation, Trials and Studies Coordinating Centre (NETSCC) | <a href="http://www.southampton.ac.uk/netsc/">www.southampton.ac.uk/netsc/</a>                                                                         |

| Knowledge synthesis organizations                                                                                                           | Website                                                                                                                                                                                                                            |
|---------------------------------------------------------------------------------------------------------------------------------------------|------------------------------------------------------------------------------------------------------------------------------------------------------------------------------------------------------------------------------------|
| National Institute for Health Research (NIHR):<br>Horizon Scanning Research & Intelligence<br>Centre (NHSC)                                 | <a href="http://www.invo.org.uk/posttypelinks/national-institute-for-health-research-national-horizon-scanning-centre/">www.invo.org.uk/posttypelinks/national-institute-for-health-research-national-horizon-scanning-centre/</a> |
| National Prescribing Service (NPS RADAR)                                                                                                    | <a href="http://www.nps.org.au/publications/health-professional/nps-radar">www.nps.org.au/publications/health-professional/nps-radar</a>                                                                                           |
| NHS Purchasing and Supply Agency Centre for<br>Evidence-based Purchasing (CEP)                                                              | <a href="http://nhscep.useconnect.co.uk/CEPProducts/Catalogue.aspx">nhscep.useconnect.co.uk/CEPProducts/Catalogue.aspx</a>                                                                                                         |
| Newfoundland and Labrador Centre for<br>Applied Health Research (NLCAHR)                                                                    | <a href="http://www.nlcahr.mun.ca/CHRSP/CompletedCHRSP.php">www.nlcahr.mun.ca/CHRSP/CompletedCHRSP.php</a>                                                                                                                         |
| Ottawa Hospital Research Institute (OHRI):<br>Knowledge Synthesis Group                                                                     | <a href="http://www.ohri.ca/ksgroup/publications.asp">www.ohri.ca/ksgroup/publications.asp</a>                                                                                                                                     |
| Ontario Ministry of Health and Long-Term<br>Care: Ontario Case Costing Initiative (OCCI)                                                    | <a href="http://www.health.gov.on.ca/en/">www.health.gov.on.ca/en/</a>                                                                                                                                                             |
| Program for Assessment of Technology in<br>Health (PATH)                                                                                    | <a href="https://www.path-hta.ca/research">https://www.path-hta.ca/research</a>                                                                                                                                                    |
| Public Health Agency of Canada: Economic<br>Burden of Illness in Canada                                                                     | <a href="http://www.phac-aspc.gc.ca/ebic-femc/index-eng.php">www.phac-aspc.gc.ca/ebic-femc/index-eng.php</a>                                                                                                                       |
| Public Health Wales                                                                                                                         | <a href="http://www.attract.wales.nhs.uk">www.attract.wales.nhs.uk</a>                                                                                                                                                             |
| Queensland Government Health Policy<br>Advisory Committee on Technology<br>(HealthPACT)                                                     | <a href="https://www.health.qld.gov.au">https://www.health.qld.gov.au</a>                                                                                                                                                          |
| Royal Australasian College of Surgeons:<br>Australian Safety and Efficacy Register of New<br>Interventional Procedures - Surgical (ASERNIP) | <a href="http://www.surgeons.org/for-health-professionals/audits-and-surgical-research/asernip-s/">www.surgeons.org/for-health-professionals/audits-and-surgical-research/asernip-s/</a>                                           |
| Sick Kids Paediatric Economic Database<br>Evaluation (PEDE)                                                                                 | <a href="http://pede.ccb.sickkids.ca/pede/search.jsp">pede.ccb.sickkids.ca/pede/search.jsp</a>                                                                                                                                     |
| Therapeutics Initiative: Therapeutics Letter                                                                                                | <a href="http://www.ti.ubc.ca/TherapeuticsLetter">www.ti.ubc.ca/TherapeuticsLetter</a>                                                                                                                                             |
| Toronto Health Economics and Technology<br>Assessment Collaborative (THETA)                                                                 | <a href="http://theta.utoronto.ca/content.php?pid=411861&amp;sid=3372336">theta.utoronto.ca/content.php?pid=411861&amp;sid=3372336</a>                                                                                             |
| University of Aberdeen Health Economics<br>Research Unit (HERU)                                                                             | <a href="https://www.abdn.ac.uk/heru/">https://www.abdn.ac.uk/heru/</a>                                                                                                                                                            |
| University of British Columbia Centre for<br>Health Services and Policy Research                                                            | <a href="http://chspr.ubc.ca">chspr.ubc.ca</a>                                                                                                                                                                                     |
| University of York: Centre for Reviews and<br>Dissemination (CRD)                                                                           | <a href="https://www.york.ac.uk/crd/">https://www.york.ac.uk/crd/</a>                                                                                                                                                              |
| Washington State Health Care Authority                                                                                                      | <a href="https://www.hca.wa.gov">https://www.hca.wa.gov</a>                                                                                                                                                                        |
| World Health Organization Regional Office for<br>Europe: Health Evidence Network (WHO HEN)                                                  | <a href="http://www.euro.who.int/en/data-and-evidence/evidence-informed-policy-making/health-evidence-network-hen">www.euro.who.int/en/data-and-evidence/evidence-informed-policy-making/health-evidence-network-hen</a>           |
