# Supplementary material for: Environmental scan and evaluation of best practices for online systematic review resources
Source: PubMed Central journal article supplement (PMC5886503; doi:10.5195/jmla.2018.241), 2018-04-01
Supplement: jmla-106-208-s003.pdf [file jmla-106-208-s003.pdf]

## Environmental scan and evaluation of best practices for online systematic review resources

Robin M. N. Parker, MLIS; Leah Boulos; Sarah Visintini; Krista Ritchie; Jill Hayden

### APPENDIX C

#### Full list of evaluated resources, alphabetically by host

| Host                                                                                                            | Name of resource                                                                                                       |
|-----------------------------------------------------------------------------------------------------------------|------------------------------------------------------------------------------------------------------------------------|
| Online courses                                                                                                  |                                                                                                                        |
| Coursera/Johns Hopkins Bloomberg School of Public Health                                                        | Introduction to Systematic Review and Meta-Analysis                                                                    |
| Dalla Lana School of Public Health, University of Toronto/Knowledge Translation Program, St. Michael's Hospital | Introduction to Systematic Review and Meta-Analysis Course                                                             |
| EPPI-Centre                                                                                                     | Systematic Reviews: Meta-Analysis, Qualitative Synthesis, and Mixed Mode Synthesis*                                    |
| EPPI-Centre                                                                                                     | Systematic Reviews: Diversity, Design and Debate†                                                                      |
| Joanna Briggs Institute                                                                                         | Comprehensive Systematic Review Training Program (CSRTP)*                                                              |
| National Center for the Dissemination of Disability Research                                                    | Developing Evidence-Based Products Using the Systematic Review Process                                                 |
| University College London (UCL) Life Learning                                                                   | Systematic Reviews 1: Introduction<br>Systematic Reviews 2: Analysing Data<br>Systematic Reviews 3: Interpreting Data† |
| Web modules                                                                                                     |                                                                                                                        |
| Cochrane Training                                                                                               | Online Learning Modules for Cochrane Authors*                                                                          |
| Evidence-Based Behavioral Practice                                                                              | Introduction to Systematic Reviews                                                                                     |
| National Certification Corporation                                                                              | WB1619 Systematic Review to Support Evidence Based Practice                                                            |
| Teach Epi: A Website for Teaching and Learning Epidemiology                                                     | EPIB-672: Systematic Reviews and Meta-Analyses                                                                         |
| University of Edinburgh Centre for Cognitive Ageing and Cognitive Epidemiology                                  | Systematic Reviews and Meta-Analyses: A Step-by-Step Guide                                                             |
| Videos                                                                                                          |                                                                                                                        |
| Campbell Collaboration                                                                                          | Campbell Collaboration Training Videos                                                                                 |
| Center on Knowledge Translation for Disability and Rehabilitation Research (KTDRR)                              | Qualitative Research Synthesis: KTDRR's Web-based Workshop Series                                                      |
| Complete Sports Care/Queen Mary University of London                                                            | Introduction to Completing A Systematic Review                                                                         |
| Knowledge Translation for Employment Research Center                                                            | Knowledge Production Methods†                                                                                          |
| methods@manchester: University of Manchester                                                                    | What Is Systematic Reviews by Helen Worthington                                                                        |
| Neurosurgery Research & Education Foundation                                                                    | Systematic Reviews and Meta-Analysis                                                                                   |

| Host                                                                                                                   | Name of resource                                                                                    |
|------------------------------------------------------------------------------------------------------------------------|-----------------------------------------------------------------------------------------------------|
| Research Centers in Minority Institutions<br>(RCMI) Program University of Puerto Rico<br>(UPR) Medical Sciences Campus | Systematic Review and Meta-Analysis Workshop<br>(two parts)                                         |
| Syrian American Medical Society (SAMS)<br>Education Committee                                                          | SAMS Evidence-Based Medicine (EBM) Course:<br>Systematic Reviews 1 & 2, Hassan Murad (two<br>parts) |

\* Name of resource has changed since evaluation was completed.

† No longer available as evaluated.
