# Supplementary material for: Environmental scan and evaluation of best practices for online systematic review resources
Source: PubMed Central journal article supplement (PMC5886503; doi:10.5195/jmla.2018.241), 2018-04-01
Supplement: jmla-106-208-s004.pdf [file jmla-106-208-s004.pdf]

## Environmental scan and evaluation of best practices for online systematic review resources

Robin M. N. Parker, MLIS; Leah Boulos; Sarah Visintini; Krista Ritchie; Jill Hayden

### APPENDIX D

#### Exact evaluation scores for each resource

| Resource #                   | Content                                            |       |       |       |       |       |       |       | Design |       |       |       |    | Interactivity |    |       |       | Usability |       |    |     |     | Total score |        |        |        |        |       |       |
|------------------------------|----------------------------------------------------|-------|-------|-------|-------|-------|-------|-------|--------|-------|-------|-------|----|---------------|----|-------|-------|-----------|-------|----|-----|-----|-------------|--------|--------|--------|--------|-------|-------|
|                              | 1.                                                 | 2. A) | 2. B) | 2. C) | 2. D) | 2. E) | 2. F) | 2. G) | 3.     | 4. A) | 4. B) | 4. C) | 5. | 6.            | 7. | 8. A) | 8. B) | 8. C)     | 8. D) | 9. | 10. | 11. | 12. A)      | 12. B) | 12. C) | 12. D) | 12. E) | n/37  | (%)   |
| R01                          | Defining a research question/Developing a protocol |       |       |       |       |       |       |       |        |       |       |       |    |               |    |       |       |           |       |    |     |     |             |        |        |        |        |       |       |
|                              | Rigorous search process                            |       |       |       |       |       |       |       |        |       |       |       |    |               |    |       |       |           |       |    |     |     |             |        |        |        |        |       |       |
|                              | Selection criteria                                 | 1     | 1     | 1     | 1     | 1     | 1     | 1     | 4      | 1     | 1     | 1     | 2  | 1             | 5  | 1     | 1     | 1         | 1     | 1  | 1   | 1   | 1           | 1      | 1      | 1      | 1      | 34/37 | (92%) |
|                              | Critical appraisal or risk of bias assessment      |       |       |       |       |       |       |       |        |       |       |       |    |               |    |       |       |           |       |    |     |     |             |        |        |        |        |       |       |
| Data extraction              |                                                    |       |       |       |       |       |       |       |        |       |       |       |    |               |    |       |       |           |       |    |     |     |             |        |        |        |        |       |       |
| Presenting findings/analysis |                                                    |       |       |       |       |       |       |       |        |       |       |       |    |               |    |       |       |           |       |    |     |     |             |        |        |        |        |       |       |
| R02                          | Defining a research question/Developing a protocol |       |       |       |       |       |       |       |        |       |       |       |    |               |    |       |       |           |       |    |     |     |             |        |        |        |        |       |       |
|                              | Rigorous search process                            |       |       |       |       |       |       |       |        |       |       |       |    |               |    |       |       |           |       |    |     |     |             |        |        |        |        |       |       |
|                              | Selection criteria                                 | 1     | 1     | 1     | 1     | 1     | 1     | 0.5   | 5      | 0.5   | 1     | 1     | 2  | 1             | 4  | 1     | 1     | 1         | 1     | 1  | 1   | 1   | 1           | 1      | 1      | 1      | 1      | 33/37 | (89%) |
|                              | Critical appraisal or risk of bias assessment      |       |       |       |       |       |       |       |        |       |       |       |    |               |    |       |       |           |       |    |     |     |             |        |        |        |        |       |       |
| Data extraction              |                                                    |       |       |       |       |       |       |       |        |       |       |       |    |               |    |       |       |           |       |    |     |     |             |        |        |        |        |       |       |
| Presenting findings/analysis |                                                    |       |       |       |       |       |       |       |        |       |       |       |    |               |    |       |       |           |       |    |     |     |             |        |        |        |        |       |       |

| Resource # | Content                                                                                          |       |       |       |       |       |       | Design |    |       |       |       | Interactivity |    |    |       |       | Usability |       |    |     |     | Total score |        |        |        |        |         |       |
|------------|--------------------------------------------------------------------------------------------------|-------|-------|-------|-------|-------|-------|--------|----|-------|-------|-------|---------------|----|----|-------|-------|-----------|-------|----|-----|-----|-------------|--------|--------|--------|--------|---------|-------|
|            | 1.                                                                                               | 2. A) | 2. B) | 2. C) | 2. D) | 2. E) | 2. F) | 2. G)  | 3. | 4. A) | 4. B) | 4. C) | 5.            | 6. | 7. | 8. A) | 8. B) | 8. C)     | 8. D) | 9. | 10. | 11. | 12. A)      | 12. B) | 12. C) | 12. D) | 12. E) | n/37    | (%)   |
| R03        | Defining a research question/Developing a protocol                                               |       |       |       |       |       |       |        |    |       |       |       |               |    |    |       |       |           |       |    |     |     |             |        |        |        |        | 32.5/37 | (88%) |
|            | Rigorous search process                                                                          | 1     | 1     | 0.5   | 1     | 1     | 1     | 1      | 6  | 1     | 1     | 1     | 2             | 1  | 3  | 1     | 1     | 1         | 0     | 1  | 1   | 1   | 1           | 1      | 1      | 1      | 1      |         |       |
|            | Critical appraisal or risk of bias assessment                                                    |       |       |       |       |       |       |        |    |       |       |       |               |    |    |       |       |           |       |    |     |     |             |        |        |        |        |         |       |
|            | Data extraction<br>Presenting findings/analysis                                                  |       |       |       |       |       |       |        |    |       |       |       |               |    |    |       |       |           |       |    |     |     |             |        |        |        |        |         |       |
| R04        | Defining a research question/Developing a protocol                                               |       |       |       |       |       |       |        |    |       |       |       |               |    |    |       |       |           |       |    |     |     |             |        |        |        |        | 29.5/37 | (80%) |
|            | Rigorous search process                                                                          |       |       |       |       |       |       |        |    |       |       |       |               |    |    |       |       |           |       |    |     |     |             |        |        |        |        |         |       |
|            | Selection criteria                                                                               | 1     | 1     | 1     | 1     | 1     | 1     | 0.5    | 6  | 0.5   | 1     | 1     | 2             | 1  | 5  | 1     | 1     | 1         | 1     | 1  | 0   | 0.5 | 1           | 0      | 0      | 0      | 0      |         |       |
|            | Critical appraisal or risk of bias assessment<br>Data extraction<br>Presenting findings/analysis |       |       |       |       |       |       |        |    |       |       |       |               |    |    |       |       |           |       |    |     |     |             |        |        |        |        |         |       |

| Resource #                   | Content                                            |       |       |       |       |       |       | Design |    |       |       |       | Interactivity |    |    |       |       | Usability |       |    |     |     | Total score |        |        |        |        |         |       |
|------------------------------|----------------------------------------------------|-------|-------|-------|-------|-------|-------|--------|----|-------|-------|-------|---------------|----|----|-------|-------|-----------|-------|----|-----|-----|-------------|--------|--------|--------|--------|---------|-------|
|                              | 1.                                                 | 2. A) | 2. B) | 2. C) | 2. D) | 2. E) | 2. F) | 2. G)  | 3. | 4. A) | 4. B) | 4. C) | 5.            | 6. | 7. | 8. A) | 8. B) | 8. C)     | 8. D) | 9. | 10. | 11. | 12. A)      | 12. B) | 12. C) | 12. D) | 12. E) | n/37    | (%)   |
| R05                          | Defining a research question/Developing a protocol |       |       |       |       |       |       |        |    |       |       |       |               |    |    |       |       |           |       |    |     |     |             |        |        |        |        |         |       |
|                              | Rigorous search process                            |       |       |       |       |       |       |        |    |       |       |       |               |    |    |       |       |           |       |    |     |     |             |        |        |        |        |         |       |
|                              | Selection criteria                                 | 1     | 1     | 1     | 1     | 1     | 0     | 1      | 6  | 0.5   | 1     | 1     | 2             | 1  | 5  | 1     | 1     | 1         | 1     | 0  | 0   | 1   | 0           | 0      | 0      | 0      | 0      | 27.5/37 | (74%) |
|                              | Critical appraisal or risk of bias assessment      |       |       |       |       |       |       |        |    |       |       |       |               |    |    |       |       |           |       |    |     |     |             |        |        |        |        |         |       |
|                              | Data extraction                                    |       |       |       |       |       |       |        |    |       |       |       |               |    |    |       |       |           |       |    |     |     |             |        |        |        |        |         |       |
| R06                          | Presenting findings/analysis                       |       |       |       |       |       |       |        |    |       |       |       |               |    |    |       |       |           |       |    |     |     |             |        |        |        |        |         |       |
|                              | Defining a research question/Developing a protocol |       |       |       |       |       |       |        |    |       |       |       |               |    |    |       |       |           |       |    |     |     |             |        |        |        |        |         |       |
|                              | Rigorous search process                            | 1     | 1     | 1     | 1     | 0     | 0     | 0      | 3  | 1     | 1     | 0     | 2             | 1  | 4  | 1     | 1     | 1         | 1     | 1  | 1   | 1   | 0           | 0      | 1      | 1      | 1      | 26/37   | (70%) |
|                              | Selection criteria                                 |       |       |       |       |       |       |        |    |       |       |       |               |    |    |       |       |           |       |    |     |     |             |        |        |        |        |         |       |
|                              | Data extraction                                    |       |       |       |       |       |       |        |    |       |       |       |               |    |    |       |       |           |       |    |     |     |             |        |        |        |        |         |       |
| Presenting findings/analysis |                                                    |       |       |       |       |       |       |        |    |       |       |       |               |    |    |       |       |           |       |    |     |     |             |        |        |        |        |         |       |

| Resource # | Content                                            |       |       |       |       |       |       | Design |    |       |       |       | Interactivity |     |    |       |       | Usability |       |     |     |     | Total score |        |        |        |        |         |       |
|------------|----------------------------------------------------|-------|-------|-------|-------|-------|-------|--------|----|-------|-------|-------|---------------|-----|----|-------|-------|-----------|-------|-----|-----|-----|-------------|--------|--------|--------|--------|---------|-------|
|            | 1.                                                 | 2. A) | 2. B) | 2. C) | 2. D) | 2. E) | 2. F) | 2. G)  | 3. | 4. A) | 4. B) | 4. C) | 5.            | 6.  | 7. | 8. A) | 8. B) | 8. C)     | 8. D) | 9.  | 10. | 11. | 12. A)      | 12. B) | 12. C) | 12. D) | 12. E) | n/37    | (%)   |
| R07        | Defining a research question/Developing a protocol |       |       |       |       |       |       |        |    |       |       |       |               |     |    |       |       |           |       |     |     |     |             |        |        |        |        |         |       |
|            | Rigorous search process                            |       |       |       |       |       |       |        |    |       |       |       |               |     |    |       |       |           |       |     |     |     |             |        |        |        |        |         |       |
|            | Selection criteria                                 | 1     | 1     | 0.5   | 1     | 1     | 1     | 1      | 3  | 1     | 0     | 0     | 2             | 1   | 2  | 1     | 1     | 1         | 0     | 1   | 1   | 1   | 1           | 1      | 1      | 0      | 0      | 24.5/37 | (66%) |
|            | Critical appraisal or risk of bias assessment      |       |       |       |       |       |       |        |    |       |       |       |               |     |    |       |       |           |       |     |     |     |             |        |        |        |        |         |       |
| R08        | Data extraction                                    |       |       |       |       |       |       |        |    |       |       |       |               |     |    |       |       |           |       |     |     |     |             |        |        |        |        |         |       |
|            | Presenting findings/analysis                       |       |       |       |       |       |       |        |    |       |       |       |               |     |    |       |       |           |       |     |     |     |             |        |        |        |        |         |       |
|            | Defining a research question/Developing a protocol |       |       |       |       |       |       |        |    |       |       |       |               |     |    |       |       |           |       |     |     |     |             |        |        |        |        |         |       |
|            | Rigorous search process                            |       |       |       |       |       |       |        |    |       |       |       |               |     |    |       |       |           |       |     |     |     |             |        |        |        |        |         |       |
| R08        | Selection criteria                                 | 1     | 1     | 1     | 0.5   | 1     | 1     | 1      | 2  | 1     | 0     | 0     | 2             | 0.5 | 2  | 0.5   | 0     | 0         | 0     | 0.5 | 0.5 | 0.5 | 1           | 1      | 1      | 1      | 1      | 21/37   | (57%) |
|            | Critical appraisal or risk of bias assessment      |       |       |       |       |       |       |        |    |       |       |       |               |     |    |       |       |           |       |     |     |     |             |        |        |        |        |         |       |
|            | Data extraction                                    |       |       |       |       |       |       |        |    |       |       |       |               |     |    |       |       |           |       |     |     |     |             |        |        |        |        |         |       |
|            | Presenting findings/analysis                       |       |       |       |       |       |       |        |    |       |       |       |               |     |    |       |       |           |       |     |     |     |             |        |        |        |        |         |       |

| Resource # | Content                                            |       |       |       |       |       |       | Design |    |       |       |       | Interactivity |     |    |       |       | Usability |       |     |     |     | Total score |        |        |        |        |       |       |
|------------|----------------------------------------------------|-------|-------|-------|-------|-------|-------|--------|----|-------|-------|-------|---------------|-----|----|-------|-------|-----------|-------|-----|-----|-----|-------------|--------|--------|--------|--------|-------|-------|
|            | 1.                                                 | 2. A) | 2. B) | 2. C) | 2. D) | 2. E) | 2. F) | 2. G)  | 3. | 4. A) | 4. B) | 4. C) | 5.            | 6.  | 7. | 8. A) | 8. B) | 8. C)     | 8. D) | 9.  | 10. | 11. | 12. A)      | 12. B) | 12. C) | 12. D) | 12. E) | n/37  | (%)   |
| R09        | Defining a research question/Developing a protocol |       |       |       |       |       |       |        |    |       |       |       |               |     |    |       |       |           |       |     |     |     |             |        |        |        |        |       |       |
|            | Rigorous search process                            |       |       |       |       |       |       |        |    |       |       |       |               |     |    |       |       |           |       |     |     |     |             |        |        |        |        |       |       |
|            | Selection criteria                                 | 1     | 1     | 1     | 0.5   | 1     | 1     | 1      | 1  | 1     | 0.5   | 0.5   | 2             | 0.5 | 2  | 0.5   | 0.5   | 0         | 0     | 0.5 | 0   | 0.5 | 1           | 1      | 1      | 1      | 1      | 21/37 | (57%) |
|            | Critical appraisal or risk of bias assessment      |       |       |       |       |       |       |        |    |       |       |       |               |     |    |       |       |           |       |     |     |     |             |        |        |        |        |       |       |
|            | Data extraction                                    |       |       |       |       |       |       |        |    |       |       |       |               |     |    |       |       |           |       |     |     |     |             |        |        |        |        |       |       |
| R10        | Presenting findings/analysis                       |       |       |       |       |       |       |        |    |       |       |       |               |     |    |       |       |           |       |     |     |     |             |        |        |        |        |       |       |
|            | Defining a research question/Developing a protocol |       |       |       |       |       |       |        |    |       |       |       |               |     |    |       |       |           |       |     |     |     |             |        |        |        |        |       |       |
|            | Rigorous search process                            |       |       |       |       |       |       |        |    |       |       |       |               |     |    |       |       |           |       |     |     |     |             |        |        |        |        |       |       |
|            | Selection criteria                                 | 1     | 1     | 1     | 0     | 0     | 0.5   | 1      | 2  | 1     | 1     | 0.5   | 1             | 0.5 | 3  | 1     | 1     | 1         | 0     | 0.5 | 0   | 1   | 0           | 1      | 0      | 1      | 1      | 21/37 | (57%) |
|            | Critical appraisal or risk of bias assessment      |       |       |       |       |       |       |        |    |       |       |       |               |     |    |       |       |           |       |     |     |     |             |        |        |        |        |       |       |
| R11        | Data extraction                                    |       |       |       |       |       |       |        |    |       |       |       |               |     |    |       |       |           |       |     |     |     |             |        |        |        |        |       |       |
|            | Presenting findings/analysis                       |       |       |       |       |       |       |        |    |       |       |       |               |     |    |       |       |           |       |     |     |     |             |        |        |        |        |       |       |
|            | Rigorous search process                            |       |       |       |       |       |       |        |    |       |       |       |               |     |    |       |       |           |       |     |     |     |             |        |        |        |        |       |       |
| R11        | Critical appraisal or risk of bias assessment      | 0.5   | 1     | 1     | 1     | 0.5   | 1     | 0.5    | 2  | 1     | 1     | 1     | 2             | 0   | 1  | 0.5   | 0.5   | 0.5       | 0     | 1   | 0.5 | 0.5 | 1           | 0      | 1      | 1      | 1      | 21/37 | (57%) |
|            | Presenting findings/analysis                       |       |       |       |       |       |       |        |    |       |       |       |               |     |    |       |       |           |       |     |     |     |             |        |        |        |        |       |       |

| Resource # | Content                                            |       |       |       |       |       |       | Design |    |       |       |       | Interactivity |     |    |       |       | Usability |       |     |     |     | Total score |        |        |        |        |      |     |     |   |   |   |   |   |         |       |
|------------|----------------------------------------------------|-------|-------|-------|-------|-------|-------|--------|----|-------|-------|-------|---------------|-----|----|-------|-------|-----------|-------|-----|-----|-----|-------------|--------|--------|--------|--------|------|-----|-----|---|---|---|---|---|---------|-------|
|            | 1.                                                 | 2. A) | 2. B) | 2. C) | 2. D) | 2. E) | 2. F) | 2. G)  | 3. | 4. A) | 4. B) | 4. C) | 5.            | 6.  | 7. | 8. A) | 8. B) | 8. C)     | 8. D) | 9.  | 10. | 11. | 12. A)      | 12. B) | 12. C) | 12. D) | 12. E) | n/37 | (%) |     |   |   |   |   |   |         |       |
| R12        | Defining a research question/Developing a protocol |       |       |       |       |       |       |        |    |       |       |       |               |     |    |       |       |           |       |     |     |     |             |        |        |        |        |      |     |     |   |   |   |   |   |         |       |
|            | Rigorous search process                            |       |       |       |       |       |       |        |    |       |       |       |               |     |    |       |       |           |       |     |     |     |             |        |        |        |        |      |     |     |   |   |   |   |   |         |       |
|            | Selection criteria                                 |       |       |       |       |       |       | 1      | 1  | 1     | 1     | 1     | 1             | 1   | 1  | 1     | 0.5   | 0         | 0     | 0   | 2   | 0.5 | 2           | 0.5    | 0.5    | 0      | 0      | 0.5  | 0.5 | 0.5 | 1 | 1 | 1 | 1 | 1 | 20.5/37 | (55%) |
|            | Critical appraisal or risk of bias assessment      |       |       |       |       |       |       |        |    |       |       |       |               |     |    |       |       |           |       |     |     |     |             |        |        |        |        |      |     |     |   |   |   |   |   |         |       |
| R13        | Data extraction                                    |       |       |       |       |       |       |        |    |       |       |       |               |     |    |       |       |           |       |     |     |     |             |        |        |        |        |      |     |     |   |   |   |   |   |         |       |
|            | Presenting findings/analysis                       |       |       |       |       |       |       |        |    |       |       |       |               |     |    |       |       |           |       |     |     |     |             |        |        |        |        |      |     |     |   |   |   |   |   |         |       |
|            | Critical appraisal or risk of bias assessment      |       |       |       |       |       |       | 1      | 0  | 1     | 1     | 0     | 0             | 0   | 6  | 1     | 1     | 0         | 0     | 1   | 4   | 1   | 1           | 1      | 1      | 0      | 0      | 0    | 0   | 0   | 0 | 0 | 0 | 0 | 0 | 0       | 20/37 |
| R14        | Data extraction                                    |       |       |       |       |       |       |        |    |       |       |       |               |     |    |       |       |           |       |     |     |     |             |        |        |        |        |      |     |     |   |   |   |   |   |         |       |
|            | Presenting findings/analysis                       |       |       |       |       |       |       |        |    |       |       |       |               |     |    |       |       |           |       |     |     |     |             |        |        |        |        |      |     |     |   |   |   |   |   |         |       |
|            | Defining a research question/Developing a protocol |       |       |       |       |       |       |        |    |       |       |       |               |     |    |       |       |           |       |     |     |     |             |        |        |        |        |      |     |     |   |   |   |   |   |         |       |
|            | Rigorous search process                            |       |       |       |       |       |       | 1      | 1  | 1     | 1     | 0.5   | 1             | 0.5 | 1  | 0.5   | 0     | 0         | 1     | 0.5 | 2   | 0.5 | 0.5         | 0      | 0      | 1      | 1      | 1    | 1   | 1   | 1 | 1 | 1 | 1 | 1 | 1       | 20/37 |
|            | Critical appraisal or risk of bias assessment      |       |       |       |       |       |       |        |    |       |       |       |               |     |    |       |       |           |       |     |     |     |             |        |        |        |        |      |     |     |   |   |   |   |   |         |       |
|            | Data extraction                                    |       |       |       |       |       |       |        |    |       |       |       |               |     |    |       |       |           |       |     |     |     |             |        |        |        |        |      |     |     |   |   |   |   |   |         |       |
|            | Presenting findings/analysis                       |       |       |       |       |       |       |        |    |       |       |       |               |     |    |       |       |           |       |     |     |     |             |        |        |        |        |      |     |     |   |   |   |   |   |         |       |

| Resource #                   | Content                                            |       |       |       |       |       |       | Design |    |       |       |       | Interactivity |     |    |       |       | Usability |       |     |     |     | Total score |        |        |        |        |      |         |       |
|------------------------------|----------------------------------------------------|-------|-------|-------|-------|-------|-------|--------|----|-------|-------|-------|---------------|-----|----|-------|-------|-----------|-------|-----|-----|-----|-------------|--------|--------|--------|--------|------|---------|-------|
|                              | 1.                                                 | 2. A) | 2. B) | 2. C) | 2. D) | 2. E) | 2. F) | 2. G)  | 3. | 4. A) | 4. B) | 4. C) | 5.            | 6.  | 7. | 8. A) | 8. B) | 8. C)     | 8. D) | 9.  | 10. | 11. | 12. A)      | 12. B) | 12. C) | 12. D) | 12. E) | n/37 | (%)     |       |
| R15                          | Defining a research question/Developing a protocol |       |       |       |       |       |       |        |    |       |       |       |               |     |    |       |       |           |       |     |     |     |             |        |        |        |        |      |         |       |
|                              | Rigorous search process                            |       |       |       |       |       |       |        |    |       |       |       |               |     |    |       |       |           |       |     |     |     |             |        |        |        |        |      |         |       |
|                              | Selection criteria                                 | 1     | 1     | 1     | 1     | 1     | 0.5   | 0.5    | 1  | 0.5   | 0     | 0     | 2             | 0.5 | 2  | 0     | 0     | 0         | 0     | 0.5 | 1   | 1   | 1           | 1      | 1      | 1      | 1      | 1    | 19.5/37 | (53%) |
|                              | Critical appraisal or risk of bias assessment      |       |       |       |       |       |       |        |    |       |       |       |               |     |    |       |       |           |       |     |     |     |             |        |        |        |        |      |         |       |
|                              | Data extraction                                    |       |       |       |       |       |       |        |    |       |       |       |               |     |    |       |       |           |       |     |     |     |             |        |        |        |        |      |         |       |
| R16                          | Presenting findings/analysis                       |       |       |       |       |       |       |        |    |       |       |       |               |     |    |       |       |           |       |     |     |     |             |        |        |        |        |      |         |       |
|                              | Defining a research question/Developing a protocol |       |       |       |       |       |       |        |    |       |       |       |               |     |    |       |       |           |       |     |     |     |             |        |        |        |        |      |         |       |
|                              | Rigorous search process                            |       |       |       |       |       |       |        |    |       |       |       |               |     |    |       |       |           |       |     |     |     |             |        |        |        |        |      |         |       |
|                              | Selection criteria                                 | 1     | 1     | 0.5   | 0.5   | 1     | 1     | 1      | 1  | 1     | 1     | 1     | 2             | 0.5 | 2  | 0     | 0     | 0         | 0     | 0   | 0.5 | 1   | 0           | 0      | 1      | 1      | 1      | 1    | 19/37   | (51%) |
|                              | Critical appraisal or risk of bias assessment      |       |       |       |       |       |       |        |    |       |       |       |               |     |    |       |       |           |       |     |     |     |             |        |        |        |        |      |         |       |
| Data extraction              |                                                    |       |       |       |       |       |       |        |    |       |       |       |               |     |    |       |       |           |       |     |     |     |             |        |        |        |        |      |         |       |
| Presenting findings/analysis |                                                    |       |       |       |       |       |       |        |    |       |       |       |               |     |    |       |       |           |       |     |     |     |             |        |        |        |        |      |         |       |

| Resource # | Content                                            |       |       |       |       |       |       |       | Design |       |       |       |    | Interactivity |    |       |       |       | Usability |     |     |     |        | Total score |        |        |        |         |       |
|------------|----------------------------------------------------|-------|-------|-------|-------|-------|-------|-------|--------|-------|-------|-------|----|---------------|----|-------|-------|-------|-----------|-----|-----|-----|--------|-------------|--------|--------|--------|---------|-------|
|            | 1.                                                 | 2. A) | 2. B) | 2. C) | 2. D) | 2. E) | 2. F) | 2. G) | 3.     | 4. A) | 4. B) | 4. C) | 5. | 6.            | 7. | 8. A) | 8. B) | 8. C) | 8. D)     | 9.  | 10. | 11. | 12. A) | 12. B)      | 12. C) | 12. D) | 12. E) | n/37    | (%)   |
| R17        | Defining a research question/Developing a protocol |       |       |       |       |       |       |       |        |       |       |       |    |               |    |       |       |       |           |     |     |     |        |             |        |        |        |         |       |
|            | Rigorous search process                            | 0.5   | 1     | 1     | 0.5   | 1     | 1     | 1     | 1      | 1     | 0.5   | 0.5   | 2  | 0             | 0  | 0     | 0     | 0     | 0         | 0.5 | 0.5 | 0.5 | 1      | 0           | 1      | 1      | 1      | 16.5/37 | (45%) |
|            | Selection criteria                                 |       |       |       |       |       |       |       |        |       |       |       |    |               |    |       |       |       |           |     |     |     |        |             |        |        |        |         |       |
|            | Critical appraisal or risk of bias assessment      |       |       |       |       |       |       |       |        |       |       |       |    |               |    |       |       |       |           |     |     |     |        |             |        |        |        |         |       |
|            | Presenting findings/analysis                       |       |       |       |       |       |       |       |        |       |       |       |    |               |    |       |       |       |           |     |     |     |        |             |        |        |        |         |       |
| R18        | Defining a research question/Developing a protocol | 0.5   | 1     | 1     | 1     | 1     | 1     | 1     | 1      | 0.5   | 0     | 0     | 2  | 0             | 0  | 0     | 0     | 0     | 0         | 1   | 0.5 | 0.5 | 1      | 0           | 1      | 1      | 1      | 16/37   | (43%) |
|            | Rigorous search process                            |       |       |       |       |       |       |       |        |       |       |       |    |               |    |       |       |       |           |     |     |     |        |             |        |        |        |         |       |
|            | Selection criteria                                 |       |       |       |       |       |       |       |        |       |       |       |    |               |    |       |       |       |           |     |     |     |        |             |        |        |        |         |       |
| R19        | Defining a research question/Developing a protocol |       |       |       |       |       |       |       |        |       |       |       |    |               |    |       |       |       |           |     |     |     |        |             |        |        |        |         |       |
|            | Rigorous search process                            |       |       |       |       |       |       |       |        |       |       |       |    |               |    |       |       |       |           |     |     |     |        |             |        |        |        |         |       |
|            | Selection criteria                                 | 1     | 0.5   | 1     | 0.5   | 1     | 0.5   | 0.5   | 1      | 0     | 0     | 0     | 2  | 0             | 0  | 0     | 0     | 0     | 0         | 0.5 | 0.5 | 0.5 | 1      | 0           | 1      | 1      | 1      | 13.5/37 | (36%) |
|            | Critical appraisal or risk of bias assessment      |       |       |       |       |       |       |       |        |       |       |       |    |               |    |       |       |       |           |     |     |     |        |             |        |        |        |         |       |
|            | Data extraction                                    |       |       |       |       |       |       |       |        |       |       |       |    |               |    |       |       |       |           |     |     |     |        |             |        |        |        |         |       |
|            | Presenting findings/analysis                       |       |       |       |       |       |       |       |        |       |       |       |    |               |    |       |       |       |           |     |     |     |        |             |        |        |        |         |       |



| Resource # | Content                                            |       |       |       |       |       |       | Design |    |       |       |       | Interactivity |    |    |       | Usability |       |       |     |     | Total score |        |        |        |        |        |         |       |
|------------|----------------------------------------------------|-------|-------|-------|-------|-------|-------|--------|----|-------|-------|-------|---------------|----|----|-------|-----------|-------|-------|-----|-----|-------------|--------|--------|--------|--------|--------|---------|-------|
|            | 1.                                                 | 2. A) | 2. B) | 2. C) | 2. D) | 2. E) | 2. F) | 2. G)  | 3. | 4. A) | 4. B) | 4. C) | 5.            | 6. | 7. | 8. A) | 8. B)     | 8. C) | 8. D) | 9.  | 10. | 11.         | 12. A) | 12. B) | 12. C) | 12. D) | 12. E) | n/37    | (%)   |
| R20        | Defining a research question/Developing a protocol |       |       |       |       |       |       |        |    |       |       |       |               |    |    |       |           |       |       |     |     |             |        |        |        |        |        |         |       |
|            | Selection criteria                                 | 1     | 0.5   | 1     | 0     | 0.5   | 0.5   | 0.5    | 1  | 0     | 0     | 0     | 2             | 0  | 0  | 0     | 0         | 0     | 0     | 0.5 | 0.5 | 0.5         | 1      | 0      | 1      | 1      | 1      | 12.5/37 | (34%) |
|            | Critical appraisal or risk of bias assessment      |       |       |       |       |       |       |        |    |       |       |       |               |    |    |       |           |       |       |     |     |             |        |        |        |        |        |         |       |
|            | Data extraction                                    |       |       |       |       |       |       |        |    |       |       |       |               |    |    |       |           |       |       |     |     |             |        |        |        |        |        |         |       |
|            | Presenting findings/analysis                       |       |       |       |       |       |       |        |    |       |       |       |               |    |    |       |           |       |       |     |     |             |        |        |        |        |        |         |       |
